# Supplementary material for: Genetic Diversity and Population Structure of the Secondary Symbiont of Tsetse Flies, Sodalis glossinidius, in Sleeping Sickness Foci in Cameroon
Source: PubMed Central journal article supplement (PMC3160304; doi:10.1371/journal.pntd.0001281), 2011-08-23
Supplement: pntd.0001281.s001.pdf [file pntd.0001281.s001.pdf]

| <i>Populations<br/>Haplotypes</i> | Akak<br>(38) | CBIpono<br>(33) | Ebimimbang<br>(113) | Mabiogo<br>(60) | Total |
|-----------------------------------|--------------|-----------------|---------------------|-----------------|-------|
| H1                                | 2            |                 |                     |                 | 2     |
| H2                                |              | 1               |                     |                 | 1     |
| H3                                |              | 1               |                     |                 | 1     |
| H4                                |              |                 | 4                   | 1               | 5     |
| H5                                | 1            |                 | 3                   |                 | 4     |
| H6                                |              |                 | 2                   |                 | 2     |
| H7                                |              |                 | 1                   |                 | 1     |
| H8                                |              |                 | 1                   |                 | 1     |
| H9                                | 1            |                 |                     |                 | 1     |
| H10                               |              |                 | 2                   |                 | 2     |
| H11                               | 6            | 4               | 34                  | 14              | 58    |
| H12                               |              |                 | 1                   |                 | 1     |
| H13                               | 1            | 1               | 7                   |                 | 9     |
| H14                               | 6            | 5               | 25                  | 11              | 47    |
| H15                               |              |                 |                     | 1               | 1     |
| H16                               |              |                 | 1                   |                 | 1     |
| H17                               |              |                 |                     | 1               | 1     |
| H18                               |              |                 | 5                   | 2               | 7     |
| H19                               |              | 1               |                     |                 | 1     |
| H20                               | 2            | 4               |                     |                 | 6     |
| H21                               |              | 1               |                     | 1               | 2     |
| H22                               | 3            |                 |                     |                 | 3     |
| H23                               | 5            | 1               |                     | 1               | 7     |
| H24                               |              |                 | 1                   | 1               | 2     |
| H25                               | 2            |                 | 1                   |                 | 3     |
| H26                               |              | 1               |                     |                 | 1     |
| H27                               | 4            | 6               | 3                   | 13              | 26    |
| H28                               |              | 1               |                     |                 | 1     |
| H29                               |              | 1               |                     | 2               | 3     |
| H30                               | 5            | 4               | 16                  | 8               | 33    |
| H31                               |              |                 | 1                   |                 | 1     |
| H32                               |              |                 | 2                   |                 | 2     |
| H33                               |              |                 | 1                   |                 | 1     |
| H34                               |              |                 |                     | 2               | 2     |
| H35                               |              | 1               | 2                   | 2               | 5     |
